# Supplementary material for: Relationship between mental health, sleep status and screen time among university students during the COVID-19 pandemic: a cross-sectional study
Source: PubMed Central journal article supplement — BMJ Open. 2023 Dec 8;13(12):e073347. doi: 10.1136/bmjopen-2023-073347 (PMC10729102; doi:10.1136/bmjopen-2023-073347), 2023-12-08
Supplement: bmjopen-2023-073347supp001.pdf [file bmjopen-2023-073347supp001.pdf]

## Supplementary material

### Sample size estimation

The number of cross-sectional study samples in this study was calculated using the following public disclosure:

$$n = \frac{z_{\alpha}^2 * p * (1 - p)}{\delta^2}$$

In the formula, the meaning and value of each parameter are as follows:

- $\alpha$  is Type I Error, and  $\alpha$  is taken as 0.05 in this study;
- $\delta$  is the allowable error, and  $\delta$  is taken as 0.3 in this study;
- $p$  represents the incidence rate, and the amount of depression was chosen as the variable of interest to estimate the sample size, with a pre-experimental result of depression incidence = 0.3.

After substituting each parameter into the calculation,  $n=897$ . Considering certain errors and experimental mistakes, Finally, 1200 questionnaires were distributed.

Table S1. Distribution of Screen Time and Sleep Status among Mental Health Status(Depression, Anxiety, Loneliness)

| Characteristics           | Depression  |             |        | Anxiety     |             |        | Loneliness          |        |
|---------------------------|-------------|-------------|--------|-------------|-------------|--------|---------------------|--------|
|                           | No(N=604)   | Yes(N=466)  | P      | No(N=902)   | Yes(N=168)  | P      |                     | P      |
| Screen time, h, mean (SD) | 7.79 (3.14) | 8.83 (3.31) | <0.001 | 7.98 (3.18) | 8.85 (3.40) | 0.001  | 0.0334 <sup>a</sup> | 0.2755 |
| Sleep status, mean (SD)   | 4.53 (2.37) | 6.97 (2.79) | <0.001 | 5.13 (2.54) | 8.08 (3.02) | <0.001 | 0.2146 <sup>a</sup> | <0.001 |

- Spearman's correlation coefficient
- Screen Time, Sleep Status and Loneliness are continuous variables
- Depression and Anxiety are binary variables

Table S2. Association of Screen time with Depression, Anxiety, Loneliness, and Sleep status

|                       | Depression, OR (95% CI) | Anxiety, OR (95% CI)   | Loneliness, $\beta$ (95% CI) | Sleep status, $\beta$ (95% CI) |
|-----------------------|-------------------------|------------------------|------------------------------|--------------------------------|
| <b>Crude model</b>    |                         |                        |                              |                                |
| Screen time           | 1.107(1.065, 1.151)**   | 1.084(1.032, 1.139)*** | 0.032(-0.091, 0.156)         | 0.153(0.101, 0.205)***         |
| <b>Adjusted model</b> |                         |                        |                              |                                |
| Screen time           | 1.118(1.072,1.166)***   | 1.079(1.023, 1.138)**  | 0.107(-0.023, 0.237)         | 0.117(1.005, 1.095)***         |

- \*p<0.05, \*\*p<0.01, \*\*\*p<0.001

Table S3. Mediating Effect of Sleep Status on the Association Between Screen Time and Mental Health Status(Depression, Anxiety, Loneliness)

|                     | Depression, OR (95% CI)   |                            |                             |                                | Anxiety, OR (95% CI)      |                            |                             |                                |
|---------------------|---------------------------|----------------------------|-----------------------------|--------------------------------|---------------------------|----------------------------|-----------------------------|--------------------------------|
|                     | X→Y                       | X+M→Y                      | Indirect Effect<br>(95% CI) | Proportion of<br>Mediation (%) | X→Y                       | X+M→Y                      | Indirect Effect<br>(95% CI) | Proportion of<br>Mediation (%) |
| <b>Screen Time</b>  | 1.118<br>(1.072,1.166)*** | 1.095<br>(1.045, 1.146)*** | 0.044<br>(0.022, 0.066) *** | 32.89%                         | 1.079<br>(1.023, 0.138)** | 1.034<br>(0.973, 1.098)    | 0.046<br>(0.023, 0.068)***  | 57.48%                         |
| <b>Sleep Status</b> |                           | 1.457<br>(1.373, 1.547)*** |                             |                                |                           | 1.477<br>(1.375, 1.587)*** |                             |                                |

a. \*p<0.05, \*\*p<0.01, \*\*\*p<0.001

Table S4. Distribution of Screen Time and Sleep Status among Mental Health Status(Depression, Anxiety, Loneliness)

| Characteristics                      | Depression  |             |        | Anxiety     |             |        | Loneliness  |             |        |
|--------------------------------------|-------------|-------------|--------|-------------|-------------|--------|-------------|-------------|--------|
|                                      | No(N=604)   | Yes(N=466)  | P      | No(N=902)   | Yes(N=168)  | P      | No(N=463)   | Yes(N=607)  | P      |
| <b>Screen time, h,<br/>mean (SD)</b> | 7.79 (3.14) | 8.83 (3.31) | <0.001 | 7.98 (3.18) | 8.85 (3.40) | 0.001  | 8.02 (3.21) | 8.19 (3.25) | 0.41   |
| <b>Sleep status,<br/>mean (SD)</b>   | 4.53 (2.37) | 6.97 (2.79) | <0.001 | 5.13 (2.54) | 8.08 (3.02) | <0.001 | 4.96 (2.59) | 6.08 (2.92) | <0.001 |

- a. Screen Time and Sleep Status are continuous variables  
b. Depression, Anxiety and Loneliness are binary variables

Table S5. Association of Screen time with Depression, Anxiety, Loneliness, and Sleep status

|                       | Depression, OR (95% CI) | Anxiety, OR (95% CI)   | Loneliness, OR (95% CI) | Sleep status, $\beta$ (95% CI) |
|-----------------------|-------------------------|------------------------|-------------------------|--------------------------------|
| <b>Crude model</b>    |                         |                        |                         |                                |
| Screen time           | 1.107(1.065, 1.151)**   | 1.084(1.032, 1.139)*** | 1.016(0.978,1.055)      | 0.153(0.101, 0.205)***         |
| <b>Adjusted model</b> |                         |                        |                         |                                |
| Screen time           | 1.118(1.072,1.166)***   | 1.079(1.023, 1.138)**  | 1.031(0.989, 1.075)     | 0.117(1.005, 1.095)***         |

a. \*p&lt;0.05, \*\*p&lt;0.01, \*\*\*p&lt;0.001

Table S6. Mediating Effect of Sleep Status on the Association Between Screen Time and Mental Health Status(Depression, Anxiety, Loneliness)

|                     | Depression, OR (95% CI)   |                            |                             |                                | Anxiety, OR (95% CI)      |                            |                             |                                |
|---------------------|---------------------------|----------------------------|-----------------------------|--------------------------------|---------------------------|----------------------------|-----------------------------|--------------------------------|
|                     | X→Y                       | X+M→Y                      | Indirect Effect<br>(95% CI) | Proportion of<br>Mediation (%) | X→Y                       | X+M→Y                      | Indirect Effect<br>(95% CI) | Proportion of<br>Mediation (%) |
| <b>Screen Time</b>  | 1.118<br>(1.072,1.166)*** | 1.095<br>(1.045, 1.146)*** | 0.044<br>(0.022, 0.066) *** | 32.89%                         | 1.079<br>(1.023, 0.138)** | 1.034<br>(0.973, 1.098)    | 0.046<br>(0.023, 0.068)***  | 57.48%                         |
| <b>Sleep Status</b> |                           | 1.457<br>(1.373, 1.547)*** |                             |                                |                           | 1.477<br>(1.375, 1.587)*** |                             |                                |

a. \*p&lt;0.05, \*\*p&lt;0.01, \*\*\*p&lt;0.001

Table S7. Distribution of Screen Time and Sleep Status among Mental Health Status(Depression, Anxiety, Loneliness)

| Characteristics                  | Depression  |             |        | Anxiety     |             |        | Loneliness  |             |        |
|----------------------------------|-------------|-------------|--------|-------------|-------------|--------|-------------|-------------|--------|
|                                  | No(N=604)   | Yes(N=466)  | P      | No(N=902)   | Yes(N=168)  | P      | No(N=463)   | Yes(N=607)  | P      |
| <b>Screen time, h, mean (SD)</b> | 7.79 (3.14) | 8.83 (3.31) | <0.001 | 7.98 (3.18) | 8.85 (3.40) | 0.001  | 8.02 (3.21) | 8.19 (3.25) | 0.41   |
| <b>Sleep status, n(%)</b>        |             |             |        |             |             |        |             |             |        |
| Good(N=398)                      | 349(47.4%)  | 49 (14.7%)  | <0.001 | 375(41.6%)  | 23(13.7%)   | <0.001 | 216(46.7%)  | 182(30.0%)  | <0.001 |
| Bad(N=672)                       | 388(52.6%)  | 284 (85.3%) |        | 527(58.4%)  | 145 (86.3%) |        | 247(53.3%)  | 425(70.0%)  |        |

a. Screen Time is continuous variable

b. Depression, Anxiety, Loneliness and Sleep Status are binary variables

Table S8. Association of Screen time with Depression, Anxiety, Loneliness, and Sleep status

|                       | Depression, OR (95% CI) | Anxiety, OR (95% CI)   | Loneliness, OR (95% CI) | Sleep status, OR (95% CI) |
|-----------------------|-------------------------|------------------------|-------------------------|---------------------------|
| <b>Crude model</b>    |                         |                        |                         |                           |
| <b>Screen time</b>    | 1.107(1.065, 1.151)**   | 1.084(1.032, 1.139)*** | 1.016(0.978,1.055)      | 1.069(1.027, 1.112)**     |
| <b>Adjusted model</b> |                         |                        |                         |                           |
| <b>Screen time</b>    | 1.118(1.072,1.166)***   | 1.079(1.023, 1.138)**  | 1.031(0.989, 1.075)     | 1.049(1.005, 1.095)*      |

a. \*p<0.05, \*\*p<0.01, \*\*\*p<0.001

Table S9. Mediating Effect of Sleep Status on the Association Between Screen Time and Mental Health Status (Depression, Anxiety, Loneliness)

|                     | Depression, OR (95% CI)    |                            |                             |                                | Anxiety, OR (95% CI)      |                            |                             |                                |
|---------------------|----------------------------|----------------------------|-----------------------------|--------------------------------|---------------------------|----------------------------|-----------------------------|--------------------------------|
|                     | X→Y                        | X+M→Y                      | Indirect Effect<br>(95% CI) | Proportion of<br>Mediation (%) | X→Y                       | X+M→Y                      | Indirect Effect<br>(95% CI) | Proportion of<br>Mediation (%) |
| <b>Screen Time</b>  | 1.118<br>(1.072, 1.166)*** | 1.115<br>(1.066, 1.166)*** | 0.017<br>(0.016, 0.033) *   | 13.73%                         | 1.079<br>(1.023, 0.138)** | 1.067<br>(1.010, 1.128)*   | 0.016<br>(0.001, 0.031)*    | 19.68%                         |
| <b>Sleep Status</b> |                            | 5.044<br>(3.746, 6.793)*** |                             |                                |                           | 4.449<br>(2.781, 7.117)*** |                             |                                |

a. \*p<0.05, \*\*p<0.01, \*\*\*p<0.001

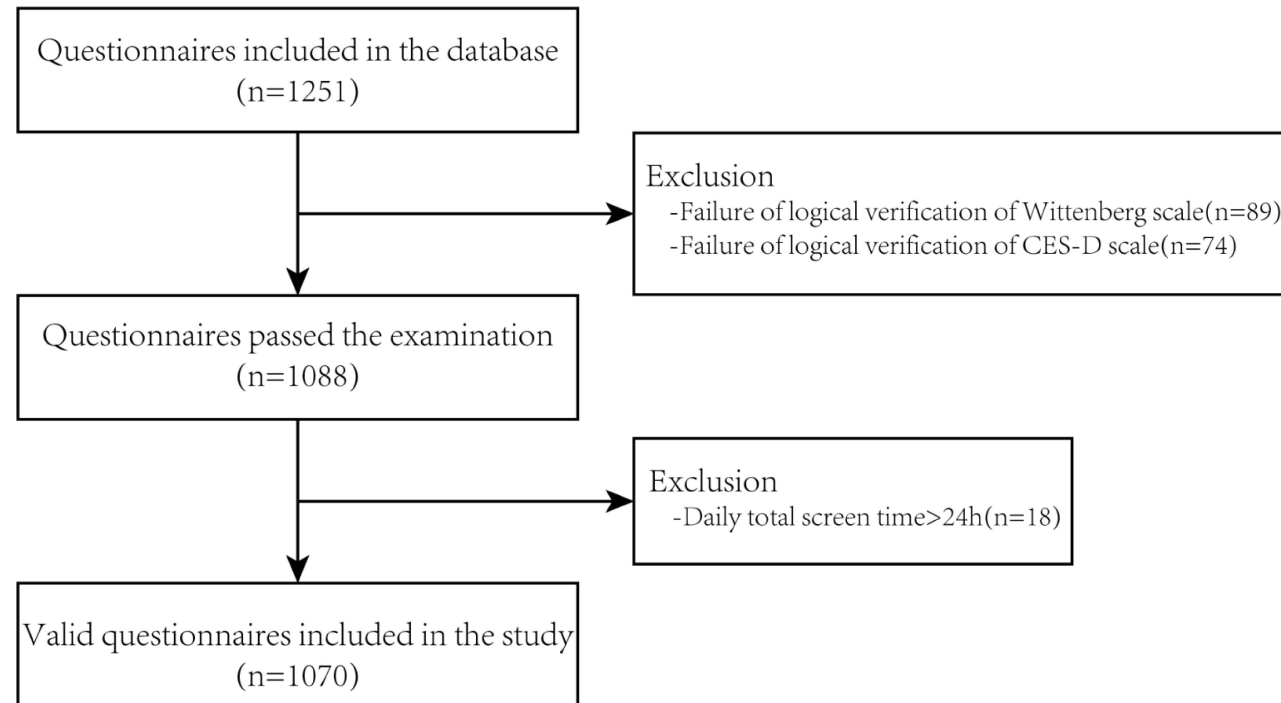

Figure S1. Flow chart of questionnaire screening.

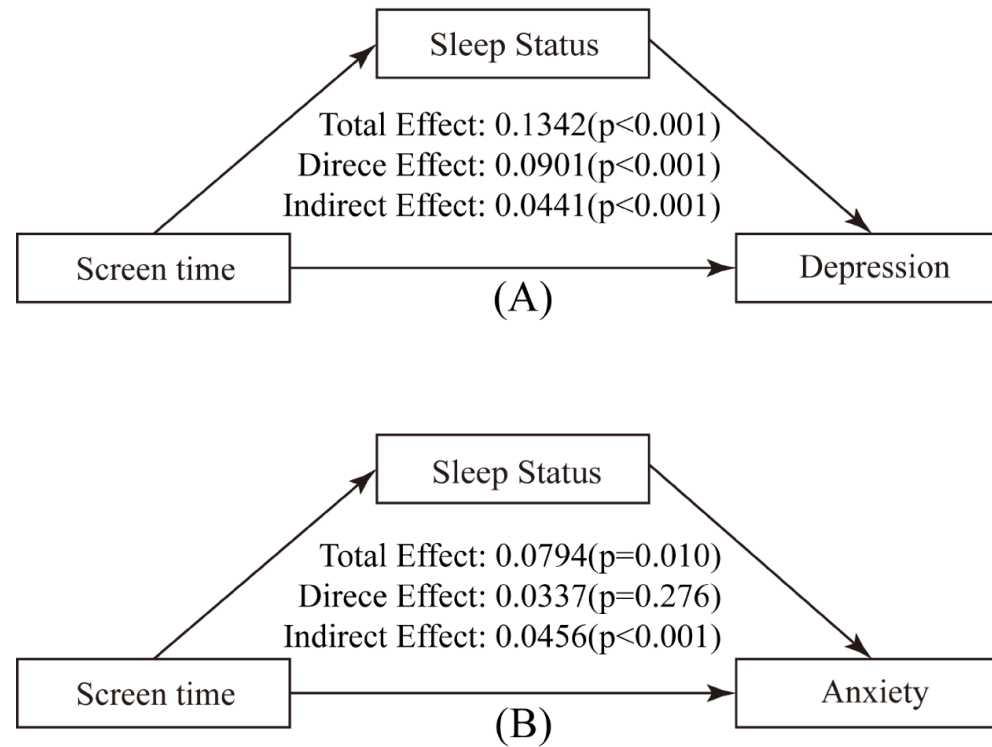

Figure S2. The intermediary model. (A) Screen time + sleep status → depression. (B) Screen time + sleep status → anxiety.  
(Screen Time, Sleep Status and Loneliness are continuous variables, Depression and Anxiety are binary variables)





Figure S3. The intermediary model. (A) Screen time + sleep status → depression. (B) Screen time + sleep status → anxiety.  
(Screen Time and Sleep Status are continuous variables, Depression, Anxiety and Loneliness are binary variables)

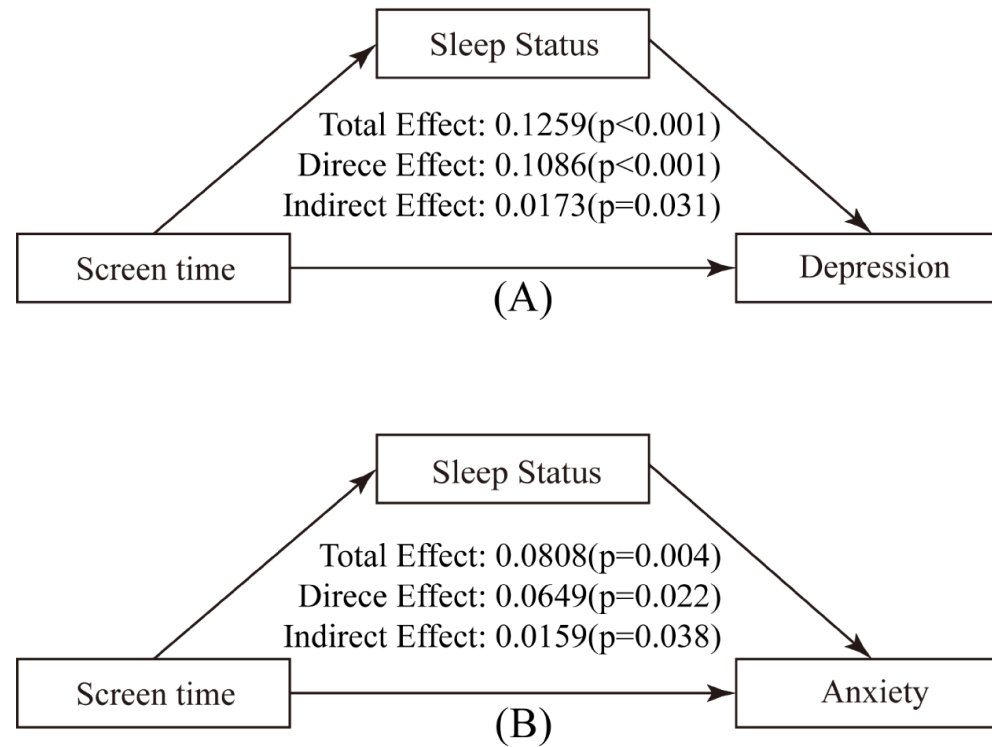

Figure S4. The intermediary model. (A) Screen time + sleep status → depression. (B) Screen time + sleep status → anxiety.  
(Screen Time is continuous variable, Depression, Anxiety, Loneliness and Sleep Status are binary variables)
